# Supplementary material for: Small Molecule Inhibitors of Middle East Respiratory Syndrome Coronavirus Fusion by Targeting Cavities on Heptad Repeat Trimers
Source: PubMed Central journal article supplement — Biomol Ther (Seoul). 2020 Mar 4;28(4):311–9. doi: 10.4062/biomolther.2019.202 (PMC7327142; doi:10.4062/biomolther.2019.202), 2020-03-04
Supplement: BT-28-311_Supple.pdf [file BT-28-311_Supple.pdf]

## Supplemental Data

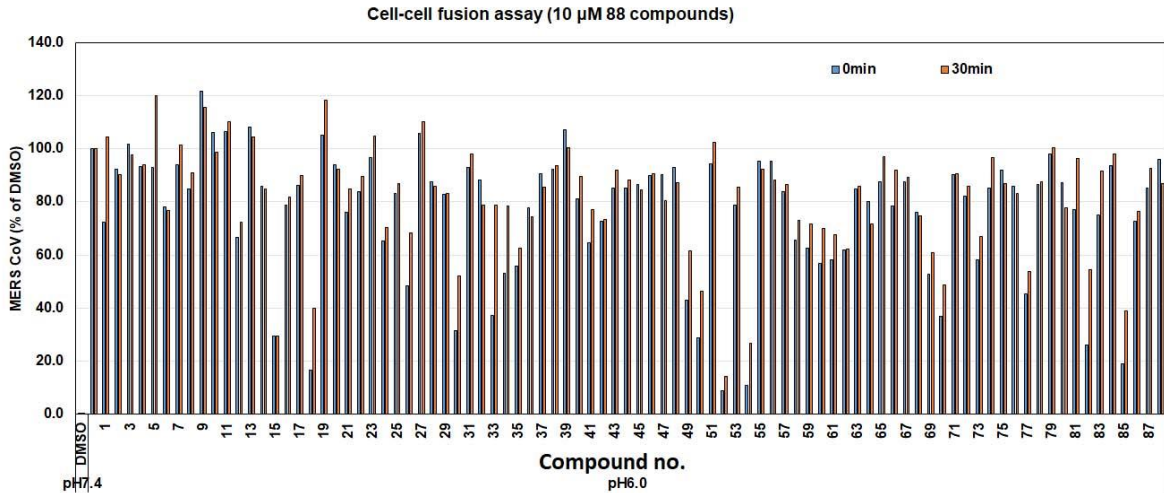

**Supplementary Fig. 1.** Effect of the time of addition of 88 compounds on MERS CoV cell-cell fusion assay. The X-axis represents the compound number. The Y-axis displays the effect of compounds on the DSP (RL) activity normalized to DMSO (control). Compounds were either incubated with MERS CoV spike expression cells for 30 min before addition of CD26/TMPRSS2 expressing cells (orange) or at the time of addition of CD26/TMPRSS2 expression cells (blue).

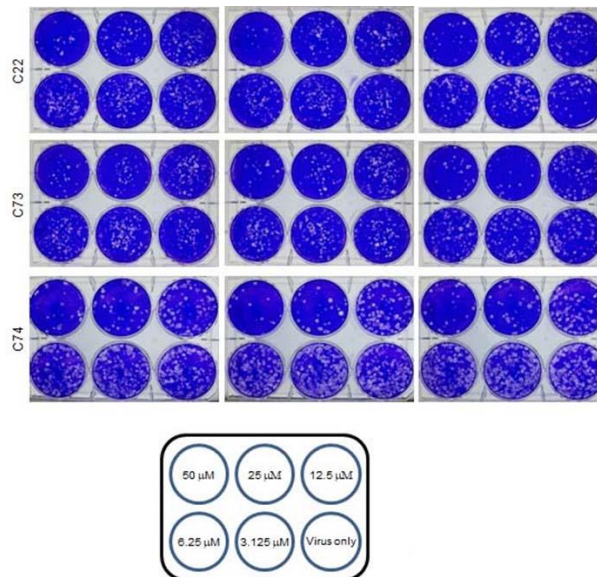

**Supplementary Fig. 2.** Inhibitory effect of compounds 22, 73, and 74 on MERS CoV infection in Vero cells. MERS CoV was pre-incubated with two-fold serially diluted compounds 22, 73, or C74 (n=3) for 30 min at 37°C. Vero cells were treated with the mixture of the virus and each compound and incubated for 4 days in DMEM/F12 containing 0.6% oxidoid agar. The plaques were observed by staining with crystal violet and counted.

**Supplementary Table 1.** The docking scores (of -8.0 or higher) and IDs of 88 compounds arranged by descending order and their corresponding binding pocket.

| Compound no | ID          | Docking score | Pocket           |
|-------------|-------------|---------------|------------------|
| 22          | 24071746    | -8.951        | P <sub>HR2</sub> |
| 74          | F2282-0127* | -8.923        | P <sub>HR2</sub> |
| 73          | 98931397    | -8.916        | P <sub>HR2</sub> |
| 75          | F2282-0124* | -8.898        | P <sub>HR2</sub> |
| 4           | 6505627     | -8.769        | P <sub>HR2</sub> |
| 76          | F2282-0128* | -8.749        | P <sub>HR2</sub> |
| 58          | 57295921    | -8.748        | P <sub>HR2</sub> |
| 77          | F2282-0139* | -8.738        | P <sub>HR2</sub> |
| 35          | 30625545    | -8.66         | P <sub>HR2</sub> |
| 78          | F2068-0373* | -8.627        | P <sub>HR2</sub> |
| 56          | 54164606    | -8.611        | P <sub>HR2</sub> |
| 49          | 45992201    | -8.569        | P <sub>HR2</sub> |
| 44          | 43459696    | -8.564        | P <sub>HR2</sub> |
| 79          | F5788-2664* | -8.55         | P <sub>HR2</sub> |
| 80          | F2323-0673* | -8.526        | P <sub>HR2</sub> |
| 18          | 13211152    | -8.521        | P <sub>HR2</sub> |
| 26          | 25947446    | -8.508        | P <sub>1</sub>   |
| 81          | F2375-0556* | -8.506        | P <sub>1</sub>   |
| 82          | F0556-0537* | -8.497        | P <sub>1</sub>   |
| 46          | 43697919    | -8.494        | P <sub>HR2</sub> |
| 15          | 10574148    | -8.486        | P <sub>HR2</sub> |
| 62          | 71147511    | -8.486        | P <sub>HR2</sub> |
| 21          | 15188232    | -8.466        | P <sub>HR2</sub> |
| 42          | 41877966    | -8.46         | P <sub>HR2</sub> |
| 50          | 46273925    | -8.439        | P <sub>HR2</sub> |
| 72          | 90291121    | -8.439        | P <sub>HR2</sub> |
| 55          | 53357526    | -8.437        | P <sub>HR2</sub> |
| 67          | 75149556    | -8.427        | P <sub>HR2</sub> |
| 17          | 11141423    | -8.426        | P <sub>HR2</sub> |
| 83          | F0556-0674* | -8.391        | P <sub>1</sub>   |
| 43          | 42864544    | -8.382        | P <sub>HR2</sub> |
| 37          | 31156947    | -8.375        | P <sub>HR2</sub> |
| 28          | 27079003    | -8.354        | P <sub>HR2</sub> |
| 84          | F2323-1532* | -8.35         | P <sub>HR2</sub> |
| 51          | 46293002    | -8.317        | P <sub>HR2</sub> |
| 32          | 29174861    | -8.309        | P <sub>HR2</sub> |
| 60          | 66172782    | -8.307        | P <sub>HR2</sub> |
| 54          | 51728554    | -8.295        | P <sub>HR2</sub> |
| 63          | 72092261    | -8.293        | P <sub>HR2</sub> |
| 40          | 41018344    | -8.287        | P <sub>HR2</sub> |
| 68          | 76861747    | -8.269        | P <sub>HR2</sub> |
| 39          | 40027187    | -8.266        | P <sub>HR2</sub> |
| 69          | 78170314    | -8.263        | P <sub>HR2</sub> |

|    |             |        |                  |
|----|-------------|--------|------------------|
| 71 | 89995246    | -8.259 | P <sub>HR2</sub> |
| 9  | 7782185     | -8.239 | P <sub>HR2</sub> |
| 19 | 13575208    | -8.235 | P <sub>HR2</sub> |
| 61 | 67801543    | -8.23  | P <sub>HR2</sub> |
| 70 | 82523386    | -8.224 | P <sub>HR2</sub> |
| 48 | 45671272    | -8.217 | P <sub>HR2</sub> |
| 1  | 5925757     | -8.213 | P <sub>HR2</sub> |
| 27 | 26680773    | -8.193 | P <sub>HR2</sub> |
| 20 | 13693110    | -8.19  | P <sub>HR2</sub> |
| 57 | 56977994    | -8.189 | P <sub>HR2</sub> |
| 31 | 29141135    | -8.181 | P <sub>HR2</sub> |
| 66 | 74695372    | -8.179 | P <sub>HR2</sub> |
| 53 | 47501212    | -8.177 | P <sub>HR2</sub> |
| 24 | 24715372    | -8.171 | P <sub>2</sub>   |
| 3  | 6434576     | -8.164 | P <sub>HR2</sub> |
| 38 | 38776116    | -8.161 | P <sub>HR2</sub> |
| 47 | 44235692    | -8.159 | P <sub>HR2</sub> |
| 52 | 46965943    | -8.157 | P <sub>HR2</sub> |
| 5  | 6824099     | -8.143 | P <sub>HR2</sub> |
| 14 | 10066614    | -8.137 | P <sub>HR2</sub> |
| 85 | F5912-0718* | -8.13  | P <sub>HR2</sub> |
| 30 | 28880861    | -8.12  | P <sub>HR2</sub> |
| 45 | 43556300    | -8.112 | P <sub>HR2</sub> |
| 86 | F2323-0674* | -8.108 | P <sub>HR2</sub> |
| 23 | 24213373    | -8.1   | P <sub>HR2</sub> |
| 59 | 59003854    | -8.1   | P <sub>2</sub>   |
| 25 | 25722219    | -8.099 | P <sub>HR2</sub> |
| 87 | F5791-1891* | -8.093 | P <sub>HR2</sub> |
| 64 | 74110675    | -8.088 | P <sub>HR2</sub> |
| 88 | F6125-2274* | -8.088 | P <sub>HR2</sub> |
| 65 | 74576651    | -8.077 | P <sub>HR2</sub> |
| 11 | 7908899     | -8.076 | P <sub>HR2</sub> |
| 13 | 7939034     | -8.05  | P <sub>HR2</sub> |
| 34 | 29401144    | -8.037 | P <sub>HR2</sub> |
| 41 | 41042980    | -8.032 | P <sub>HR2</sub> |
| 29 | 27536983    | -8.03  | P <sub>HR2</sub> |
| 33 | 29194995    | -8.029 | P <sub>HR2</sub> |
| 8  | 7671108     | -8.004 | P <sub>HR2</sub> |
| 12 | 7909919     | -8.001 | P <sub>1</sub>   |
| 2  | 5941181     | -8.001 | P <sub>1</sub>   |
| 7  | 7594379     | -8.001 | P <sub>HR2</sub> |
| 6  | 7398628     | -8     | P <sub>HR2</sub> |
| 10 | 7906284     | -8     | P <sub>HR2</sub> |
| 16 | 11095275    | -8     | P <sub>HR2</sub> |
| 36 | 31091692    | -8     | P <sub>HR2</sub> |

Compounds marked with (\*) were supplied by Life Chemicals, the rest of compounds were supplied by Chembridge.

**Supplementary Table 2.** Effect of the time of addition of 88 compounds on MERS CoV cell-cell fusion assay. Compounds were either incubated with MERS CoV spike expression cells for 30 min before addition of CD26/TMPRSS2 expressing cells or at the time of addition of CD26/TMPRSS2 expression cells.

|      | <b>0min</b>         |          | <b>30min</b>        |          |
|------|---------------------|----------|---------------------|----------|
|      | <b>AVERAG<br/>E</b> | <b>%</b> | <b>AVERAG<br/>E</b> | <b>%</b> |
| DMSO | 7.96875             | 0.399593 | 7.09375             | 0.359604 |
| DMSO | 1994.219            | 100      | 1972.656            | 100      |
| 1    | 1440                | 72.20873 | 2059                | 104.377  |
| 2    | 1840                | 92.26671 | 1781                | 90.28436 |
| 3    | 2032                | 101.8945 | 1925                | 97.58416 |
| 4    | 1861                | 93.31975 | 1856                | 94.08634 |
| 5    | 1856                | 93.06903 | 2368                | 120.0412 |
| 6    | 1557                | 78.07569 | 1514                | 76.74931 |
| 7    | 1877                | 94.12207 | 2000                | 101.3861 |
| 8    | 1691                | 84.79511 | 1797                | 91.09545 |
| 9    | 2427                | 121.7018 | 2278                | 115.4788 |
| 10   | 2117                | 106.1569 | 1947                | 98.69941 |
| 11   | 2123                | 106.4577 | 2176                | 110.3081 |
| 12   | 1328                | 66.59249 | 1429                | 72.4404  |
| 13   | 2155                | 108.0624 | 2059                | 104.377  |
| 14   | 1712                | 85.84815 | 1675                | 84.91089 |
| 15   | 586                 | 29.38494 | 581                 | 29.45267 |
| 16   | 1568                | 78.62728 | 1611                | 81.66653 |
| 17   | 1717                | 86.09888 | 1776                | 90.03089 |
| 18   | 331                 | 16.59798 | 784                 | 39.74337 |
| 19   | 2096                | 105.1038 | 2331                | 118.1655 |
| 20   | 1877                | 94.12207 | 1819                | 92.21069 |
| 21   | 1520                | 76.22032 | 1675                | 84.91089 |
| 22   | 1675                | 83.99279 | 1765                | 89.47327 |
| 23   | 1925                | 96.52903 | 2069                | 104.884  |
| 24   | 1301                | 65.23858 | 1386                | 70.26059 |
| 25   | 1659                | 83.19047 | 1717                | 87.04    |
| 26   | 965                 | 48.38988 | 1344                | 68.13149 |
| 27   | 2107                | 105.6554 | 2171                | 110.0547 |
| 28   | 1744                | 87.45279 | 1691                | 85.72198 |
| 29   | 1653                | 82.8896  | 1643                | 83.28871 |
| 30   | 629                 | 31.54117 | 1029                | 52.16317 |
| 31   | 1851                | 92.8183  | 1931                | 97.88832 |
| 32   | 1760                | 88.25511 | 1552                | 78.67564 |

|    |      |          |      |          |
|----|------|----------|------|----------|
| 33 | 741  | 37.15741 | 1557 | 78.92911 |
| 34 | 1056 | 52.95307 | 1546 | 78.37149 |
| 35 | 1114 | 55.86147 | 1237 | 62.70733 |
| 36 | 1552 | 77.82496 | 1466 | 74.31604 |
| 37 | 1808 | 90.66207 | 1685 | 85.41782 |
| 38 | 1840 | 92.26671 | 1845 | 93.52871 |
| 39 | 2134 | 107.0093 | 1979 | 100.3216 |
| 40 | 1621 | 81.28496 | 1765 | 89.47327 |
| 41 | 1290 | 64.68699 | 1520 | 77.05347 |
| 42 | 1450 | 72.71018 | 1450 | 73.50495 |
| 43 | 1701 | 85.29656 | 1813 | 91.90653 |
| 44 | 1696 | 85.04584 | 1739 | 88.15525 |
| 45 | 1723 | 86.39975 | 1669 | 84.60673 |
| 46 | 1792 | 89.85975 | 1787 | 90.58851 |
| 47 | 1797 | 90.11048 | 1584 | 80.29782 |
| 48 | 1856 | 93.06903 | 1723 | 87.34416 |
| 49 | 853  | 42.77364 | 1216 | 61.64277 |
| 50 | 570  | 28.58262 | 917  | 46.48554 |
| 51 | 1883 | 94.42294 | 2021 | 102.4507 |
| 52 | 176  | 8.825511 | 277  | 14.04198 |
| 53 | 1573 | 78.87801 | 1685 | 85.41782 |
| 54 | 213  | 10.68087 | 528  | 26.76594 |
| 55 | 1899 | 95.22526 | 1819 | 92.21069 |
| 56 | 1904 | 95.47599 | 1744 | 88.40871 |
| 57 | 1675 | 83.99279 | 1707 | 86.53307 |
| 58 | 1306 | 65.48931 | 1440 | 72.99802 |
| 59 | 1248 | 62.5809  | 1413 | 71.62931 |
| 60 | 1130 | 56.66379 | 1381 | 70.00713 |
| 61 | 1162 | 58.26843 | 1333 | 67.57386 |
| 62 | 1232 | 61.77858 | 1226 | 62.1497  |
| 63 | 1691 | 84.79511 | 1691 | 85.72198 |
| 64 | 1600 | 80.23192 | 1413 | 71.62931 |
| 65 | 1744 | 87.45279 | 1915 | 97.07723 |
| 66 | 1563 | 78.37656 | 1813 | 91.90653 |
| 67 | 1744 | 87.45279 | 1760 | 89.2198  |
| 68 | 1514 | 75.91945 | 1477 | 74.87366 |
| 69 | 1050 | 52.6522  | 1200 | 60.83168 |
| 70 | 736  | 36.90668 | 960  | 48.66535 |
| 71 | 1797 | 90.11048 | 1787 | 90.58851 |
| 72 | 1637 | 82.08728 | 1696 | 85.97545 |
| 73 | 1157 | 58.01771 | 1322 | 67.01624 |
| 74 | 1696 | 85.04584 | 1909 | 96.77307 |
| 75 | 1835 | 92.01598 | 1712 | 86.78653 |
| 76 | 1712 | 85.84815 | 1643 | 83.28871 |
| 77 | 906  | 45.43132 | 1061 | 53.78535 |

|    |      |          |      |          |
|----|------|----------|------|----------|
| 78 | 1723 | 86.39975 | 1728 | 87.59762 |
| 79 | 1952 | 97.88294 | 1984 | 100.575  |
| 80 | 1739 | 87.20207 | 1536 | 77.86455 |
| 81 | 1536 | 77.02264 | 1899 | 96.26614 |
| 82 | 517  | 25.92494 | 1077 | 54.59644 |
| 83 | 1498 | 75.11714 | 1808 | 91.65307 |
| 84 | 1867 | 93.62062 | 1931 | 97.88832 |
| 85 | 378  | 18.95479 | 768  | 38.93228 |
| 86 | 1450 | 72.71018 | 1509 | 76.49584 |
| 87 | 1701 | 85.29656 | 1829 | 92.71762 |
| 88 | 1915 | 96.02758 | 1717 | 87.04    |

**Supplementary Table 3.** In silico pharmacokinetic and other ADME descriptors of 15 compounds (10 compounds from the top docking score + 5 compounds with promising results from cell-cell fusion assay).

| molecule | mol_MW <sup>a</sup> | donorHB <sup>b</sup> | accept HB <sup>c</sup> | Human Oral Absorption % <sup>d</sup> | Rule of Five <sup>e</sup> | QLogP o/w <sup>f</sup> | #rotor <sup>g</sup> | QLogS <sup>h</sup> | QLogHERG <sup>i</sup> | QLogKp <sup>j</sup> | QPPCa <sup>k</sup> | QLogBB <sup>l</sup> | QPPMDCK <sup>m</sup> | QLogKhsa <sup>n</sup> | SASA <sup>o</sup> | FISA <sup>p</sup> | Carcinogenicity in mouse | Carcinogenicity in rat | Ames toxicity test |
|----------|---------------------|----------------------|------------------------|--------------------------------------|---------------------------|------------------------|---------------------|--------------------|-----------------------|---------------------|--------------------|---------------------|----------------------|-----------------------|-------------------|-------------------|--------------------------|------------------------|--------------------|
| C22      | 379.4               | 2.0                  | 5.7                    | 100.0                                | 0.0                       | 4.1                    | 5.0                 | -6.3               | -6.5                  | -2.4                | 514.6              | -1.1                | 436.8                | 0.6                   | 703.7             | 135.4             | positive                 | negative               | mutagen            |
| C74      | 462.0               | 0.0                  | 9.0                    | 89.8                                 | 0.0                       | 2.4                    | 5.0                 | -3.8               | -3.6                  | -2.7                | 532.6              | -0.8                | 626.0                | -0.5                  | 675.3             | 133.3             | negative                 | negative               | non-mutagen        |
| C73      | 597.7               | 1.0                  | 7.8                    | 82.5                                 | 2.0                       | 6.1                    | 4.0                 | -9.0               | -5.6                  | -2.4                | 355.2              | -0.8                | 2391.0               | 1.1                   | 902.5             | 130.8             | negative                 | negative               | non-mutagen        |
| C75      | 441.5               | 0.0                  | 9.0                    | 88.7                                 | 0.0                       | 2.2                    | 5.0                 | -3.6               | -3.6                  | -2.7                | 532.2              | -1.0                | 253.4                | -0.5                  | 683.2             | 133.4             | negative                 | negative               | non-mutagen        |
| C4       | 358.4               | 1.0                  | 5.5                    | 100.0                                | 0.0                       | 3.9                    | 5.0                 | -5.8               | -7.1                  | -2.0                | 488.5              | -1.2                | 228.1                | 0.5                   | 681.6             | 137.8             | negative                 | negative               | mutagen            |
| C76      | 455.6               | 0.0                  | 9.0                    | 89.5                                 | 0.0                       | 2.4                    | 5.0                 | -3.7               | -3.2                  | -2.9                | 532.7              | -0.9                | 253.7                | -0.4                  | 686.3             | 133.3             | negative                 | negative               | non-mutagen        |
| C58      | 578.8               | 0.0                  | 10.3                   | 71.3                                 | 2.0                       | 5.7                    | 9.0                 | -6.6               | -9.9                  | -4.5                | 114.6              | -0.2                | 58.3                 | 1.0                   | 1038.0            | 77.0              | negative                 | positive               | non-mutagen        |
| C77      | 457.5               | 0.0                  | 9.8                    | 87.6                                 | 0.0                       | 2.0                    | 6.0                 | -3.3               | -3.8                  | -2.6                | 529.2              | -1.0                | 260.7                | -0.7                  | 700.2             | 132.2             | negative                 | negative               | non-mutagen        |
| C35      | 450.6               | 2.0                  | 6.3                    | 89.8                                 | 1.0                       | 5.1                    | 9.0                 | -7.1               | -5.8                  | -1.9                | 371.9              | -1.4                | 464.3                | 0.8                   | 865.7             | 128.0             | negative                 | negative               | mutagen            |
| C78      | 474.5               | 0.0                  | 10.0                   | 88.0                                 | 0.0                       | 2.7                    | 5.0                 | -4.8               | -5.4                  | -2.5                | 342.7              | -1.2                | 388.4                | -0.5                  | 790.7             | 140.7             | negative                 | negative               | mutagen            |
| C60      | 536.7               | 0.0                  | 9.5                    | 78.1                                 | 1.0                       | 4.7                    | 9.0                 | -4.9               | -8.7                  | -3.9                | 108.3              | 0.1                 | 92.4                 | 0.5                   | 975.4             | 57.5              | negative                 | positive               | non-mutagen        |
| C61      | 498.6               | 2.0                  | 7.0                    | 95.6                                 | 1.0                       | 6.0                    | 8.0                 | -7.6               | -9.1                  | -2.4                | 379.0              | -0.4                | 347.0                | 1.2                   | 899.2             | 85.9              | negative                 | positive               | mutagen            |
| C69      | 558.6               | 2.0                  | 9.7                    | 80.2                                 | 2.0                       | 5.6                    | 13.0                | -8.1               | -7.9                  | -1.6                | 406.2              | -2.1                | 186.8                | 0.8                   | 972.8             | 146.3             | negative                 | positive               | non-mutagen        |
| C26      | 482.6               | 2.0                  | 10.7                   | 100.0                                | 0.0                       | 3.8                    | 7.0                 | -6.2               | -7.9                  | -3.4                | 484.6              | -0.3                | 373.7                | 0.4                   | 894.4             | 74.6              | positive                 | positive               | mutagen            |
| C33      | 428.6               | 2.0                  | 6.5                    | 90.5                                 | 1.0                       | 5.2                    | 8.0                 | -6.7               | -8.7                  | -2.7                | 368.7              | -0.6                | 186.1                | 1.0                   | 849.4             | 87.1              | negative                 | negative               | non-mutagen        |

<sup>a</sup>Molecular weight of the molecule, acceptable range < 500. <sup>b</sup>Hydrogen bond donor, acceptable range <5. <sup>c</sup>Hydrogen bond acceptor, acceptable range <10. <sup>d</sup>Oral absorption % in human, >80% is high, <25% is poor. <sup>e</sup>The number of violations of Lipinski's rule of five, the recommended maximum number is 3. <sup>f</sup>Predicted octanol/water partition coefficient (QLogP o/w) acceptable range <5. <sup>g</sup>Number of rotatable bonds, acceptable range 0-15. <sup>h</sup>Predicted aqueous solubility (QLogS), acceptable range <0.5. <sup>i</sup>Predicted IC50 value for blockage of HERG K

+ channels (QPlogHERG) acceptable range <-0.5. <sup>j</sup>Predicted skin permeability (QPlogKp), acceptable range -8.0-1.0. <sup>k</sup>Apparent Caco-2 cell permeability, acceptable range <25 poor, >500 great. <sup>l</sup>Predicted brain/blood partition coefficient, acceptable range -3-1.02. <sup>m</sup>Predicted apparent MDCK cell permeability, acceptable range >500 is high, <25 is poor. <sup>n</sup>binding to human serum albumin, , acceptable range -1.5-1.5. <sup>o</sup>Total solvent accessible surface area, acceptable range 300-1000. <sup>p</sup>Hydrophilic component of the SASA, acceptable range 7-330.
